# Supplementary material
Source: PubMed Central journal article supplement (PMC7959094)

**Supplemental Figure.**  
**Diagram of Cohort Selection**

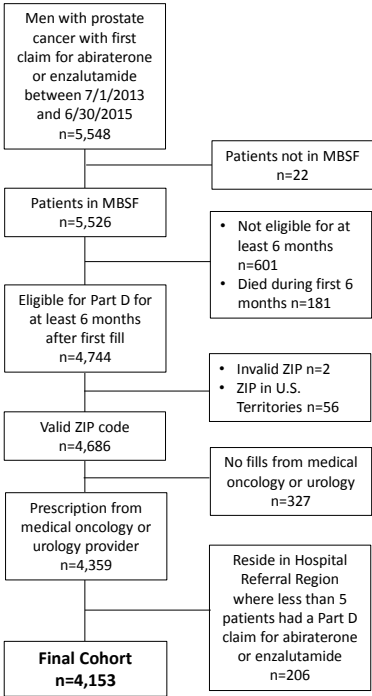

Supplement: NIHMS1638061-supplement-1.pdf [file NIHMS1638061-supplement-1.pdf]
